# Supplementary material for: Effect of oral health on chronic intestinal diseases and all-cause mortality in US adults: results from the NHANES 2005-2008 database
Source: Research Square preprint supplement (doi:10.21203/rs.3.rs-6726151/v1), 2025-06-23
Supplement: Supplementary file 1 [file c1e5a48bb0cfe54593fa1429.docx]

| **Supplementary** table 1 shows the baseline characteristics of patients grouped by oral health. | | | | | | |
| --- | --- | --- | --- | --- | --- | --- |
| **Characteristic** | **Overall**  N = 189,574,7652 | **Very good**   N = 68,403,2532 | **Good**  N = 63,101,7042 | **Fair**  N = 35,934,6452 | **Poor**   N = 22,135,1632 | **P-value**3 |
| Gender |  |  |  |  |  | <0.001 |
| male | 4,515 (49%) | 1,267 (44%) | 1,505 (52%) | 1,028 (53%) | 715 (48%) |  |
| female | 4,716 (51%) | 1,535 (56%) | 1,459 (48%) | 1,009 (47%) | 713 (52%) |  |
| Age | 46± (17) | 46± (17) | 46± (17) | 46± (16) | 49± (16) | <0.001 |
| BMI | 29± (7) | 28± (7) | 29± (7) | 29± (7) | 29± (7) | 0.002 |
| TC | 198± (41) | 198± (41) | 197± (40) | 198± (42) | 201± (45) | 0.4 |
| BUN | 12.7± (5.2) | 13.0± (4.9) | 12.8± (5.1) | 12.4± (5.2) | 12.3± (5.8) | <0.001 |
| ALB | 4.24± (0.34) | 4.25± (0.34) | 4.26± (0.35) | 4.24± (0.34) | 4.16± (0.35) | <0.001 |
| Cr | 0.90± (0.31) | 0.90± (0.29) | 0.91± (0.34) | 0.89± (0.26) | 0.90± (0.38) | 0.11 |
| Race |  |  |  |  |  | <0.001 |
| Non-Hispanic white | 4,537 (72%) | 1,702 (80%) | 1,510 (73%) | 759 (60%) | 566 (63%) |  |
| Non-Hispanic black | 1,959 (11%) | 499 (7.9%) | 629 (11%) | 463 (14%) | 368 (16%) |  |
| Mexican American | 1,712 (8.1%) | 327 (4.5%) | 501 (7.4%) | 551 (14%) | 333 (11%) |  |
| Others | 1,023 (9.2%) | 274 (7.5%) | 324 (8.8%) | 264 (13%) | 161 (9.6%) |  |
| Education level (year), n (%) |  |  |  |  |  | <0.001 |
| <9 | 1,105 (6.1%) | 164 (3.0%) | 274 (4.7%) | 350 (9.9%) | 317 (13%) |  |
| 9-12 | 3,750 (37%) | 905 (28%) | 1,200 (37%) | 920 (44%) | 725 (54%) |  |
| >12 | 4,376 (57%) | 1,733 (69%) | 1,490 (58%) | 767 (47%) | 386 (32%) |  |
| Marrired |  |  |  |  |  | <0.001 |
| Married/Partner | 5,723 (65%) | 1,796 (68%) | 1,912 (68%) | 1,247 (62%) | 768 (56%) |  |
| Single | 3,508 (35%) | 1,006 (32%) | 1,052 (32%) | 790 (38%) | 660 (44%) |  |
| PIR, n (%) |  |  |  |  |  | <0.001 |
| ≤ 1.3 | 2,637 (19%) | 526 (12%) | 710 (15%) | 726 (26%) | 675 (38%) |  |
| 1.3 to 3.5 | 3,597 (36%) | 997 (31%) | 1,192 (38%) | 851 (40%) | 557 (41%) |  |
| > 3.5 | 2,997 (45%) | 1,279 (57%) | 1,062 (47%) | 460 (34%) | 196 (20%) |  |
| Diabetes, n (%) |  |  |  |  |  | <0.001 |
| NO | 8,193 (92%) | 2,553 (93%) | 2,655 (93%) | 1,800 (91%) | 1,185 (89%) |  |
| YES | 1,038 (7.8%) | 249 (6.6%) | 309 (7.3%) | 237 (9.0%) | 243 (11%) |  |
| Hypertension, n (%) |  |  |  |  |  | <0.001 |
| NO | 6,103 (70%) | 1,927 (72%) | 1,994 (71%) | 1,351 (69%) | 831 (63%) |  |
| YES | 3,128 (30%) | 875 (28%) | 970 (29%) | 686 (31%) | 597 (37%) |  |
| Coronary heart disease,n (%) |  |  |  |  |  | <0.001 |
| NO | 8,862 (97%) | 2,721 (98%) | 2,850 (97%) | 1,954 (96%) | 1,337 (94%) |  |
| YES | 369 (3.2%) | 81 (2.1%) | 114 (3.1%) | 83 (4.0%) | 91 (5.9%) |  |
| Cancer,,n (%) |  |  |  |  |  | 0.5 |
| NO | 8,401 (91%) | 2,533 (91%) | 2,691 (92%) | 1,881 (92%) | 1,296 (90%) |  |
| YES | 830 (8.5%) | 269 (8.8%) | 273 (8.5%) | 156 (7.7%) | 132 (9.5%) |  |
| Current smoking status |  |  |  |  |  | <0.001 |
| NO | 4,810 (52%) | 1,632 (59%) | 1,626 (53%) | 1,011 (47%) | 541 (33%) |  |
| YES | 4,421 (48%) | 1,170 (41%) | 1,338 (47%) | 1,026 (53%) | 887 (67%) |  |
| Alcohol consumption,  n(%) |  |  |  |  |  | 0.024 |
| NO | 2,738 (25%) | 763 (23%) | 876 (25%) | 629 (26%) | 470 (29%) |  |
| YES | 6,493 (75%) | 2,039 (77%) | 2,088 (75%) | 1,408 (74%) | 958 (71%) |  |
| teeth ach |  |  |  |  |  | <0.001 |
| Hardly ever/Never | 710 (7.0%) | 76 (2.6%) | 116 (4.3%) | 176 (8.4%) | 342 (26%) |  |
| Occasionally | 1,463 (15%) | 189 (6.4%) | 429 (13%) | 473 (24%) | 372 (28%) |  |
| Very often/Fairly often | 7,058 (78%) | 2,537 (91%) | 2,419 (83%) | 1,388 (67%) | 714 (46%) |  |
| All-cause mortality |  |  |  |  |  | <0.001 |
| NO | 7,602 (87%) | 2,356 (89%) | 2,474 (88%) | 1,717 (87%) | 1,055 (79%) |  |
| YES | 1,624 (13%) | 444 (11%) | 488 (12%) | 319 (13%) | 373 (21%) |  |

Median (IQR) for continuous variables;

N (%) for categorical variables;

Abbreviations: PIR: Ratio of household income to poverty, BMI: Body mass index, TC: Total cholesterol, BUN: Blood Urea Nitrogen, ALB: Albumin, Cr: Creatinine

| **Supplementary** table 2 Subgroup analysis of the association between Toothache frequency and Chronic Diarrhea. | | | | | |
| --- | --- | --- | --- | --- | --- |
| Subgroup | Variable | n.total | n.event_% | OR_95CI | P.for.interaction |
| Gender |  |  |  |  |  |
| Male |  |  |  |  | 0.362 |
|  | Hardly ever/Never | 3324 | 421 (12.7) | 1(Ref) |  |
|  | Occasionally | 657 | 88 (13.4) | 1.07 (0.83~1.36) |  |
|  | Very often/Fairly often | 275 | 47 (17.1) | 1.42 (1.02~1.98) |  |
| Female |  |  |  |  |  |
|  | Hardly ever/Never | 3069 | 390 (12.7) | 1(Ref) |  |
|  | Occasionally | 616 | 101 (16.4) | 1.35 (1.06~1.71) |  |
|  | Very often/Fairly often | 333 | 66 (19.8) | 1.7 (1.27~2.27) |  |
| Age |  |  |  |  |  |
| 20-40 |  |  |  |  | 0.918 |
|  | Hardly ever/Never | 2145 | 223 (10.4) | 1(Ref) |  |
|  | Occasionally | 457 | 59 (12.9) | 1.28 (0.94~1.74) |  |
|  | Very often/Fairly often | 251 | 42 (16.7) | 1.73 (1.21~2.48) |  |
| 40-60 |  |  |  |  |  |
|  | Hardly ever/Never | 1942 | 262 (13.5) | 1(Ref) |  |
|  | Occasionally | 484 | 72 (14.9) | 1.12 (0.85~1.49) |  |
|  | Very often/Fairly often | 223 | 45 (20.2) | 1.62 (1.14~2.3) |  |
| >=60 |  |  |  |  |  |
|  | Hardly ever/Never | 2306 | 326 (14.1) | 1(Ref) |  |
|  | Occasionally | 332 | 58 (17.5) | 1.29 (0.95~1.75) |  |
|  | Very often/Fairly often | 134 | 26 (19.4) | 1.46 (0.94~2.28) |  |
| BMI |  |  |  |  |  |
| <25 |  |  |  |  | 0.972 |
|  | Hardly ever/Never | 1827 | 179 (9.8) | 1(Ref) |  |
|  | Occasionally | 347 | 37 (10.7) | 1.1 (0.76~1.6) |  |
|  | Very often/Fairly often | 191 | 29 (15.2) | 1.65 (1.08~2.52) |  |
| 25-30 |  |  |  |  |  |
|  | Hardly ever/Never | 2257 | 283 (12.5) | 1(Ref) |  |
|  | Occasionally | 437 | 64 (14.6) | 1.2 (0.89~1.6) |  |
|  | Very often/Fairly often | 181 | 33 (18.2) | 1.56 (1.05~2.31) |  |
| >=30 |  |  |  |  |  |
|  | Hardly ever/Never | 2309 | 349 (15.1) | 1(Ref) |  |
|  | Occasionally | 489 | 88 (18) | 1.23 (0.95~1.59) |  |
|  | Very often/Fairly often | 236 | 51 (21.6) | 1.55 (1.11~2.15) |  |
| Diabetes |  |  |  |  |  |
| NO |  |  |  |  | 0.703 |
|  | Hardly ever/Never | 5688 | 688 (12.1) | 1(Ref) |  |
|  | Occasionally | 1115 | 154 (13.8) | 1.16 (0.97~1.41) |  |
|  | Very often/Fairly often | 537 | 97 (18.1) | 1.6 (1.27~2.02) |  |
| YES |  |  |  |  |  |
|  | Hardly ever/Never | 705 | 123 (17.4) | 1(Ref) |  |
|  | Occasionally | 158 | 35 (22.2) | 1.35 (0.88~2.06) |  |
|  | Very often/Fairly often | 71 | 16 (22.5) | 1.38 (0.76~2.48) |  |
| Hypertension |  |  |  |  |  |
| NO |  |  |  |  | 0.132 |
|  | Hardly ever/Never | 4181 | 476 (11.4) | 1(Ref) |  |
|  | Occasionally | 841 | 100 (11.9) | 1.05 (0.83~1.32) |  |
|  | Very often/Fairly often | 389 | 59 (15.2) | 1.39 (1.04~1.87) |  |
| YES |  |  |  |  |  |
|  | Hardly ever/Never | 2212 | 335 (15.1) | 1(Ref) |  |
|  | Occasionally | 432 | 89 (20.6) | 1.45 (1.12~1.89) |  |
|  | Very often/Fairly often | 219 | 54 (24.7) | 1.83 (1.32~2.55) |  |
| Coronary heart disease |  |  |  |  |  |
| NO |  |  |  |  | 0.149 |
|  | Hardly ever/Never | 6131 | 785 (12.8) | 1(Ref) |  |
|  | Occasionally | 1220 | 182 (14.9) | 1.19 (1~1.42) |  |
|  | Very often/Fairly often | 588 | 106 (18) | 1.5 (1.2~1.87) |  |
| YES |  |  |  |  |  |
|  | Hardly ever/Never | 262 | 26 (9.9) | 1(Ref) |  |
|  | Occasionally | 53 | 7 (13.2) | 1.38 (0.57~3.37) |  |
|  | Very often/Fairly often | 20 | 7 (35) | 4.89 (1.79~13.34) |  |
| Cancer history |  |  |  |  |  |
| NO |  |  |  |  | 0.35 |
|  | Hardly ever/Never | 5794 | 719 (12.4) | 1(Ref) |  |
|  | Occasionally | 1177 | 171 (14.5) | 1.2 (1~1.44) |  |
|  | Very often/Fairly often | 560 | 98 (17.5) | 1.5 (1.19~1.89) |  |
| YES |  |  |  |  |  |
|  | Hardly ever/Never | 599 | 92 (15.4) | 1(Ref) |  |
|  | Occasionally | 96 | 18 (18.8) | 1.27 (0.73~2.22) |  |
|  | Very often/Fairly often | 48 | 15 (31.2) | 2.5 (1.31~4.8) |  |
| Smoke |  |  |  |  |  |
| NO |  |  |  |  | 0.952 |
|  | Hardly ever/Never | 3357 | 400 (11.9) | 1(Ref) |  |
|  | Occasionally | 630 | 88 (14) | 1.2 (0.94~1.54) |  |
|  | Very often/Fairly often | 255 | 43 (16.9) | 1.5 (1.06~2.12) |  |
| YES |  |  |  |  |  |
|  | Hardly ever/Never | 3036 | 411 (13.5) | 1(Ref) |  |
|  | Occasionally | 643 | 101 (15.7) | 1.19 (0.94~1.51) |  |
|  | Very often/Fairly often | 353 | 70 (19.8) | 1.58 (1.19~2.09) |  |
| Alcohol |  |  |  |  |  |
| NO |  |  |  |  | 0.492 |
|  | Hardly ever/Never | 1788 | 272 (15.2) | 1(Ref) |  |
|  | Occasionally | 374 | 58 (15.5) | 1.02 (0.75~1.39) |  |
|  | Very often/Fairly often | 181 | 36 (19.9) | 1.38 (0.94~2.04) |  |
| YES |  |  |  |  |  |
|  | Hardly ever/Never | 4605 | 539 (11.7) | 1(Ref) |  |
|  | Occasionally | 899 | 131 (14.6) | 1.29 (1.05~1.58) |  |
|  | Very often/Fairly often | 427 | 77 (18) | 1.66 (1.28~2.16) |  |

| **Supplementary** table 3 Subgroup analysis of the association between Toothache frequency and Chronic Constipation. | | | | | |
| --- | --- | --- | --- | --- | --- |
| Subgroup | Variable | n.total | n.event_% | OR_95CI | P.for.interaction |
| Gender |  |  |  |  |  |
| Male |  |  |  |  | 0.641 |
|  | Hardly ever/Never | 3084 | 181 (5.9) | 1(Ref) |  |
|  | Occasionally | 618 | 49 (7.9) | 1.38 (0.99~1.92) |  |
|  | Very often/Fairly often | 257 | 29 (11.3) | 2.04 (1.35~3.09) |  |
| Female |  |  |  |  |  |
|  | Hardly ever/Never | 3163 | 484 (15.3) | 1(Ref) |  |
|  | Occasionally | 656 | 141 (21.5) | 1.52 (1.23~1.87) |  |
|  | Very often/Fairly often | 340 | 73 (21.5) | 1.51 (1.15~2) |  |
| Age |  |  |  |  |  |
| 20-40 |  |  |  |  | 0.624 |
|  | Hardly ever/Never | 2204 | 282 (12.8) | 1(Ref) |  |
|  | Occasionally | 487 | 89 (18.3) | 1.52 (1.17~1.98) |  |
|  | Very often/Fairly often | 254 | 45 (17.7) | 1.47 (1.04~2.07) |  |
| 40-60 |  |  |  |  |  |
|  | Hardly ever/Never | 1861 | 181 (9.7) | 1(Ref) |  |
|  | Occasionally | 474 | 62 (13.1) | 1.4 (1.03~1.9) |  |
|  | Very often/Fairly often | 216 | 38 (17.6) | 1.98 (1.35~2.9) |  |
| >=60 |  |  |  |  |  |
|  | Hardly ever/Never | 2182 | 202 (9.3) | 1(Ref) |  |
|  | Occasionally | 313 | 39 (12.5) | 1.4 (0.97~2.01) |  |
|  | Very often/Fairly often | 127 | 19 (15) | 1.72 (1.04~2.87) |  |
| BMI |  |  |  |  |  |
| <25 |  |  |  |  | 0.403 |
|  | Hardly ever/Never | 1886 | 238 (12.6) | 1(Ref) |  |
|  | Occasionally | 363 | 53 (14.6) | 1.18 (0.86~1.63) |  |
|  | Very often/Fairly often | 206 | 44 (21.4) | 1.88 (1.31~2.7) |  |
| 25-30 |  |  |  |  |  |
|  | Hardly ever/Never | 2194 | 220 (10) | 1(Ref) |  |
|  | Occasionally | 443 | 70 (15.8) | 1.68 (1.26~2.25) |  |
|  | Very often/Fairly often | 178 | 30 (16.9) | 1.82 (1.2~2.76) |  |
| >=30 |  |  |  |  |  |
|  | Hardly ever/Never | 2167 | 207 (9.6) | 1(Ref) |  |
|  | Occasionally | 468 | 67 (14.3) | 1.58 (1.18~2.13) |  |
|  | Very often/Fairly often | 213 | 28 (13.1) | 1.43 (0.94~2.19) |  |
| Diabetes |  |  |  |  |  |
| NO |  |  |  |  | 0.272 |
|  | Hardly ever/Never | 5588 | 588 (10.5) | 1(Ref) |  |
|  | Occasionally | 1130 | 169 (15) | 1.5 (1.24~1.8) |  |
|  | Very often/Fairly often | 536 | 96 (17.9) | 1.86 (1.46~2.35) |  |
| YES |  |  |  |  |  |
|  | Hardly ever/Never | 659 | 77 (11.7) | 1(Ref) |  |
|  | Occasionally | 144 | 21 (14.6) | 1.29 (0.77~2.17) |  |
|  | Very often/Fairly often | 61 | 6 (9.8) | 0.82 (0.34~1.98) |  |
| Hypertension |  |  |  |  |  |
| NO |  |  |  |  | 0.858 |
|  | Hardly ever/Never | 4186 | 481 (11.5) | 1(Ref) |  |
|  | Occasionally | 877 | 136 (15.5) | 1.41 (1.15~1.74) |  |
|  | Very often/Fairly often | 405 | 75 (18.5) | 1.75 (1.34~2.29) |  |
| YES |  |  |  |  |  |
|  | Hardly ever/Never | 2061 | 184 (8.9) | 1(Ref) |  |
|  | Occasionally | 397 | 54 (13.6) | 1.61 (1.16~2.22) |  |
|  | Very often/Fairly often | 192 | 27 (14.1) | 1.67 (1.08~2.58) |  |
| Coronary heart disease |  |  |  |  |  |
| NO |  |  |  |  | 0.934 |
|  | Hardly ever/Never | 5986 | 640 (10.7) | 1(Ref) |  |
|  | Occasionally | 1222 | 184 (15.1) | 1.48 (1.24~1.77) |  |
|  | Very often/Fairly often | 581 | 99 (17) | 1.72 (1.36~2.16) |  |
| YES |  |  |  |  |  |
|  | Hardly ever/Never | 261 | 25 (9.6) | 1(Ref) |  |
|  | Occasionally | 52 | 6 (11.5) | 1.23 (0.48~3.17) |  |
|  | Very often/Fairly often | 16 | 3 (18.8) | 2.18 (0.58~8.17) |  |
| Cancer history |  |  |  |  |  |
| NO |  |  |  |  | 0.126 |
|  | Hardly ever/Never | 5685 | 610 (10.7) | 1(Ref) |  |
|  | Occasionally | 1173 | 167 (14.2) | 1.38 (1.15~1.66) |  |
|  | Very often/Fairly often | 555 | 93 (16.8) | 1.67 (1.32~2.12) |  |
| YES |  |  |  |  |  |
|  | Hardly ever/Never | 562 | 55 (9.8) | 1(Ref) |  |
|  | Occasionally | 101 | 23 (22.8) | 2.72 (1.58~4.67) |  |
|  | Very often/Fairly often | 42 | 9 (21.4) | 2.51 (1.14~5.53) |  |
| Smoke |  |  |  |  |  |
| NO |  |  |  |  | 0.094 |
|  | Hardly ever/Never | 3379 | 422 (12.5) | 1(Ref) |  |
|  | Occasionally | 646 | 104 (16.1) | 1.34 (1.06~1.7) |  |
|  | Very often/Fairly often | 254 | 42 (16.5) | 1.39 (0.98~1.96) |  |
| YES |  |  |  |  |  |
|  | Hardly ever/Never | 2868 | 243 (8.5) | 1(Ref) |  |
|  | Occasionally | 628 | 86 (13.7) | 1.71 (1.32~2.23) |  |
|  | Very often/Fairly often | 343 | 60 (17.5) | 2.29 (1.68~3.12) |  |
| Alcohol |  |  |  |  |  |
| NO |  |  |  |  | 0.241 |
|  | Hardly ever/Never | 1799 | 283 (15.7) | 1(Ref) |  |
|  | Occasionally | 390 | 74 (19) | 1.25 (0.95~1.67) |  |
|  | Very often/Fairly often | 183 | 38 (20.8) | 1.4 (0.96~2.05) |  |
| YES |  |  |  |  |  |
|  | Hardly ever/Never | 4448 | 382 (8.6) | 1(Ref) |  |
|  | Occasionally | 884 | 116 (13.1) | 1.61 (1.29~2.01) |  |
|  | Very often/Fairly often | 414 | 64 (15.5) | 1.95 (1.46~2.59) |  |

| **Supplementary** table 4 Baseline characteristics of the constipation populations according to oral health. | | | | | | |
| --- | --- | --- | --- | --- | --- | --- |
| **Characteristic** | **Overall**  N = 18,048,7592 | **Very good**   N = 5,458,1082 | **Good**  N = 6,177,9662 | **Fair**  N = 3,352,4202 | **Poor**   N = 3,060,2652 | **p-value**3 |
| Gender |  |  |  |  |  | 0.014 |
| male | 259 (24%) | 54 (16%) | 85 (25%) | 63 (28%) | 57 (30%) |  |
| female | 698 (76%) | 204 (84%) | 227 (75%) | 148 (72%) | 119 (70%) |  |
| Age | 44± (18) | 44± (19) | 44± (18) | 42± (16) | 48± (15) | <0.001 |
| BMI | 28± (7) | 27± (6) | 28± (7) | 27± (6) | 29± (7) | 0.11 |
| TC | 199± (43) | 197± (44) | 195± (38) | 197± (41) | 213± (49) | <0.001 |
| BUN | 12.2± (5.3) | 12.4± (4.3) | 12.3± (5.5) | 11.9± (5.0) | 12.2± (6.7) | 0.13 |
| ALB | 4.17± (0.37) | 4.23± (0.34) | 4.15± (0.37) | 4.16± (0.39) | 4.15± (0.40) | 0.2 |
| Cr | 0.85± (0.33) | 0.84± (0.27) | 0.85± (0.36) | 0.84± (0.28) | 0.88± (0.39) | 0.7 |
| Race |  |  |  |  |  | <0.001 |
| Non-Hispanic white | 417 (66%) | 140 (74%) | 146 (69%) | 64 (50%) | 67 (63%) |  |
| Non-Hispanic black | 267 (17%) | 60 (12%) | 82 (16%) | 64 (23%) | 61 (20%) |  |
| Mexican American | 164 (7.9%) | 26 (4.3%) | 48 (6.2%) | 62 (17%) | 28 (7.6%) |  |
| Others | 109 (9.3%) | 32 (9.3%) | 36 (8.4%) | 21 (11%) | 20 (9.2%) |  |
| Education level (year), n (%) |  |  |  |  |  | <0.001 |
| <9 | 131 (7.7%) | 22 (4.1%) | 30 (4.2%) | 41 (15%) | 38 (13%) |  |
| 9-12 | 455 (45%) | 97 (35%) | 153 (48%) | 110 (48%) | 95 (57%) |  |
| >12 | 371 (47%) | 139 (61%) | 129 (48%) | 60 (37%) | 43 (30%) |  |
| Marrired |  |  |  |  |  | 0.079 |
| Married/Partner | 538 (59%) | 147 (57%) | 177 (62%) | 131 (67%) | 83 (50%) |  |
| Single | 419 (41%) | 111 (43%) | 135 (38%) | 80 (33%) | 93 (50%) |  |
| PIR, n (%) |  |  |  |  |  | <0.001 |
| ≤ 1.3 | 338 (26%) | 61 (18%) | 101 (21%) | 95 (37%) | 81 (39%) |  |
| 1.3 to 3.5 | 390 (40%) | 108 (35%) | 131 (43%) | 81 (38%) | 70 (44%) |  |
| > 3.5 | 229 (34%) | 89 (47%) | 80 (36%) | 35 (25%) | 25 (17%) |  |
| Diabetes, n (%) |  |  |  |  |  | 0.3 |
| NO | 853 (92%) | 238 (94%) | 285 (93%) | 185 (90%) | 145 (89%) |  |
| YES | 104 (7.9%) | 20 (6.1%) | 27 (6.8%) | 26 (9.8%) | 31 (11%) |  |
| Hypertension, n (%)  NO    YES | 692 (73%)  265(27%) | 199 (75%)  59(25%) | 277(74%)  85(26%) | 163(78%)  48(22%) | 103(64%)  73(36%) | 0.2 |
| Coronary heart disease,n (%) |  |  |  |  |  | 0.6 |
| NO | 923 (97%) | 251 (98%) | 301 (98%) | 204 (96%) | 167 (97%) |  |
| YES | 34 (2.5%) | 7 (2.4%) | 11 (1.8%) | 7 (3.8%) | 9 (2.7%) |  |
| Cancer,,n (%) |  |  |  |  |  | 0.7 |
| NO | 870 (91%) | 237 (92%) | 284 (90%) | 190 (91%) | 159 (89%) |  |
| YES | 87 (9.1%) | 21 (7.7%) | 28 (9.6%) | 21 (8.9%) | 17 (11%) |  |
| Current smoking status |  |  |  |  |  | <0.001 |
| NO | 568 (59%) | 177 (72%) | 203 (64%) | 122 (53%) | 66 (30%) |  |
| YES | 389 (41%) | 81 (28%) | 109 (36%) | 89 (47%) | 110 (70%) |  |
| Alcohol consumption,  n(%) |  |  |  |  |  | 0.8 |
| NO | 395 (37%) | 99 (35%) | 141 (40%) | 84 (36%) | 71 (37%) |  |
| YES | 562 (63%) | 159 (65%) | 171 (60%) | 127 (64%) | 105 (63%) |  |
| teeth ach |  |  |  |  |  | <0.001 |
| Hardly ever/Never | 102 (10%) | 6 (1.6%) | 18 (6.6%) | 31 (15%) | 47 (29%) |  |
| Occasionally | 190 (18%) | 22 (7.7%) | 67 (20%) | 54 (28%) | 47 (25%) |  |
| Very often/Fairly often | 665 (71%) | 230 (91%) | 227 (74%) | 126 (57%) | 82 (46%) |  |
| All-cause mortality |  |  |  |  |  | 0.2 |
| NO | 792 (86%) | 217 (87%) | 261 (88%) | 182 (87%) | 132 (81%) |  |
| YES | 165 (14%) | 41 (13%) | 51 (12%) | 29 (13%) | 44 (19%) |  |

Median (IQR) for continuous variables;

N (%) for categorical variables;

Abbreviations: PIR: Ratio of household income to poverty, BMI: Body mass index, TC: Total cholesterol, BUN: Blood Urea Nitrogen, ALB: Albumin, Cr: Creatinine

| **Supplementary** table5 Baseline characteristics of the diarrhea populations according to oral health. | | | | | | |
| --- | --- | --- | --- | --- | --- | --- |
| **Characteristic** | **Overall**  N = 20,399,6212 | **Very good**   N = 6,524,5152 | **Good**  N = 6,372,2302 | **Fair**  N = 4,508,4982 | **Poor**   N = 2,994,3782 | **p-value**3 |
| Gender |  |  |  |  |  | 0.2 |
| male | 556 (52%) | 146 (47%) | 165 (53%) | 143 (58%) | 102 (48%) |  |
| female | 557 (48%) | 156 (53%) | 156 (47%) | 134 (42%) | 111 (52%) |  |
| Age | 49± (16) | 48± (16) | 49± (15) | 49± (15) | 51± (15) | 0.14 |
| BMI | 30± (8) | 29± (7) | 31± (8) | 31± (9) | 31± (8) | 0.078 |
| TC | 201± (42) | 203± (43) | 197± (40) | 208± (45) | 196± (38) | 0.12 |
| BUN | 13.0± (5.3) | 13.4± (5.8) | 13.0± (5.0) | 12.7± (4.5) | 12.3± (6.1) | 0.11 |
| ALB | 4.21± (0.35) | 4.23± (0.34) | 4.24± (0.37) | 4.22± (0.35) | 4.11± (0.35) | 0.017 |
| Cr | 0.91± (0.34) | 0.90± (0.33) | 0.90± (0.29) | 0.92± (0.27) | 0.93± (0.51) | 0.4 |
| Race |  |  |  |  |  | 0.006 |
| Non-Hispanic white | 475 (67%) | 158 (74%) | 148 (68%) | 91 (58%) | 78 (59%) |  |
| Non-Hispanic black | 269 (13%) | 69 (11%) | 67 (11%) | 72 (15%) | 61 (20%) |  |
| Mexican American | 242 (10%) | 48 (6.7%) | 65 (9.3%) | 79 (15%) | 50 (12%) |  |
| Others | 127 (9.8%) | 27 (8.4%) | 41 (11%) | 35 (12%) | 24 (8.6%) |  |
| Education level (year), n (%) |  |  |  |  |  | <0.001 |
| <9 | 184 (9.4%) | 30 (6.3%) | 37 (6.9%) | 59 (12%) | 58 (18%) |  |
| 9-12 | 473 (38%) | 109 (33%) | 136 (37%) | 118 (37%) | 110 (55%) |  |
| >12 | 456 (52%) | 163 (61%) | 148 (57%) | 100 (50%) | 45 (27%) |  |
| Marrired |  |  |  |  |  | 0.009 |
| Married/Partner | 673 (65%) | 192 (71%) | 198 (65%) | 179 (67%) | 104 (49%) |  |
| Single | 440 (35%) | 110 (29%) | 123 (35%) | 98 (33%) | 109 (51%) |  |
| PIR, n (%) |  |  |  |  |  | <0.001 |
| ≤ 1.3 | 371 (23%) | 67 (14%) | 93 (19%) | 98 (24%) | 113 (47%) |  |
| 1.3 to 3.5 | 434 (37%) | 114 (35%) | 131 (40%) | 118 (39%) | 71 (31%) |  |
| > 3.5 | 308 (41%) | 121 (51%) | 97 (41%) | 61 (37%) | 29 (22%) |  |
| Diabetes, n (%) |  |  |  |  |  | 0.2 |
| NO | 939 (88%) | 263 (91%) | 264 (85%) | 237 (88%) | 175 (88%) |  |
| YES | 174 (12%) | 39 (8.6%) | 57 (15%) | 40 (12%) | 38 (12%) |  |
| Hypertension, n (%)  NO    YES | 635 (62%)  478(38%) | 182 (67%)  120(33%） | 188(63%)  133(37%) | 152 (56%)  125(44%) | 113 (57%)  100(43%) | 0.2 |
| Coronary heart disease,n (%) |  |  |  |  |  | 0.3 |
| NO | 1,073 (97%) | 290 (98%) | 313 (98%) | 270 (98%) | 200 (95%) |  |
| YES | 40 (2.6%) | 12 (2.4%) | 8 (2.5%) | 7 (1.8%) | 13 (4.6%) |  |
| Cancer,,n (%) |  |  |  |  |  | 0.061 |
| NO | 988 (89%) | 271 (91%) | 276 (85%) | 255 (93%) | 186 (88%) |  |
| YES | 125 (11%) | 31 (9.2%) | 45 (15%) | 22 (6.9%) | 27 (12%) |  |
| Current smoking status |  |  |  |  |  | 0.005 |
| NO | 531 (46%) | 161 (52%) | 157 (48%) | 133 (46%) | 80 (31%) |  |
| YES | 582 (54%) | 141 (48%) | 164 (52%) | 144 (54%) | 133 (69%) |  |
| Alcohol consumption,  n(%) |  |  |  |  |  | 0.7 |
| NO | 366 (27%) | 93 (24%) | 102 (28%) | 102 (29%) | 69 (29%) |  |
| YES | 747 (73%) | 209 (76%) | 219 (72%) | 175 (71%) | 144 (71%) |  |
| teeth ach |  |  |  |  |  | <0.001 |
| Hardlyever/Never | 113 (10%) | 12 (5.3%) | 12 (4.0%) | 30 (11%) | 59 (32%) |  |
| Occasionally | 189 (16%) | 24 (9.1%) | 51 (15%) | 60 (20%) | 54 (29%) |  |
| Very often/Fairly often | 811 (74%) | 266 (86%) | 258 (81%) | 187 (69%) | 100 (40%) |  |
| All-cause mortality |  |  |  |  |  | 0.005 |
| NO | 883 (84%) | 256 (90%) | 255 (83%) | 224 (84%) | 148 (74%) |  |
| YES | 230 (16%) | 46 (10%) | 66 (17%) | 53 (16%) | 65 (26%) |  |

Median (IQR) for continuous variables;

N (%) for categorical variables;

Abbreviations: PIR: Ratio of household income to poverty, BMI: Body mass index, TC: Total cholesterol, BUN: Blood Urea Nitrogen, ALB: Albumin, Cr: Creatinine
